# Supplementary material for: Genome-wide association study of susceptibility to Pseudomonas aeruginosa infection in cystic fibrosis
Source: PubMed Central journal article supplement — Eur Respir J. 2024 Nov 7;64(5):2400062. doi: 10.1183/13993003.00062-2024 (PMC11540985; doi:10.1183/13993003.00062-2024), 2024-11-07

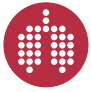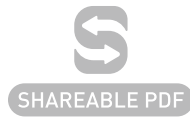

# Genome-wide association study of susceptibility to *Pseudomonas aeruginosa* infection in cystic fibrosis

Boxi Lin , Jiafen Gong, Katherine Keenan, Fan Lin, Yu-chung Lin, Julie Mésinèle, Claire Calmel, Badreddine Mohand Oumoussa, Pierre-Yves Boëlle, Loïc Guillot , Harriet Corvol , Valerie Waters, Lei Sun and Lisa J. Strug

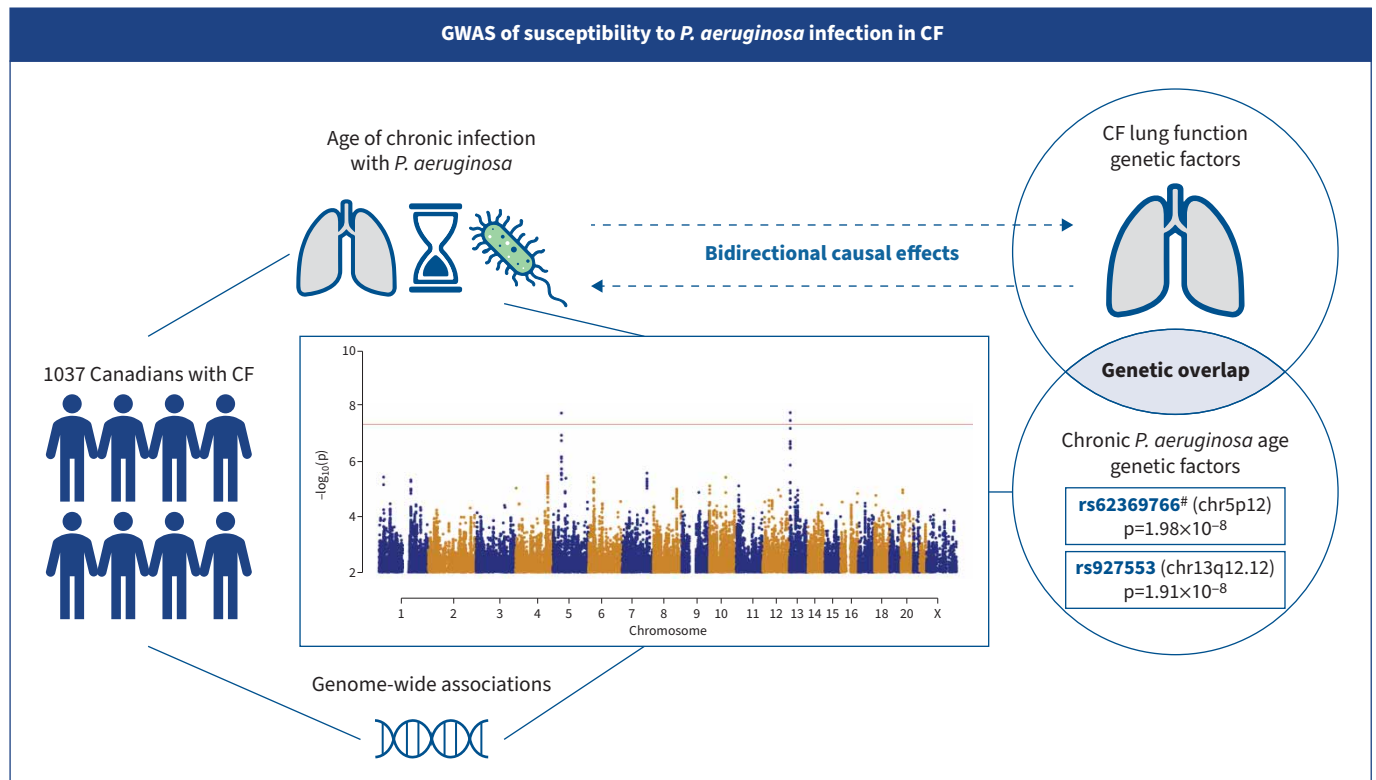

**GRAPHICAL ABSTRACT** Summary of the study. In a genome-wide association study (GWAS) of 1037 Canadians with cystic fibrosis (CF), we found two novel loci linked to chronic *Pseudomonas aeruginosa* infection age. We found evidence of a shared polygenic component and a potential causal relationship between chronic *P. aeruginosa* infection and lung disease. #: the rs62369766 locus was validated using an independent French cohort (n=501).

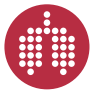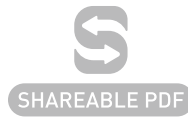

# Genome-wide association study of susceptibility to *Pseudomonas aeruginosa* infection in cystic fibrosis

Boxi Lin<sup>1,2</sup>, Jiafen Gong<sup>2</sup>, Katherine Keenan<sup>2</sup>, Fan Lin<sup>2</sup>, Yu-chung Lin<sup>1,2</sup>, Julie Mésinè<sup>3,4</sup>, Claire Calmel<sup>3</sup>, Badreddine Mohand Oumoussa<sup>5</sup>, Pierre-Yves Boëlle<sup>6</sup>, Loïc Guillot<sup>3</sup>, Harriet Corvol<sup>3,7</sup>, Valerie Waters<sup>8,9</sup>, Lei Sun<sup>1,10</sup> and Lisa J. Strug<sup>1,2,10,11,12</sup>

<sup>1</sup>Biostatistics Division, Dalla Lana School of Public Health, University of Toronto, Toronto, ON, Canada. <sup>2</sup>Program in Genetics and Genome Biology, The Hospital for Sick Children, Toronto, ON, Canada. <sup>3</sup>Sorbonne Université, Inserm U938, Centre de Recherche Saint-Antoine (CRSA), Paris, France. <sup>4</sup>Inovarian, Paris, France. <sup>5</sup>Sorbonne Université, Inserm, UMS Production et Analyse des données en Sciences de la vie et en Santé (PASS), Plateforme Post-génomique de la Pitié-Salpêtrière, Paris, France. <sup>6</sup>Sorbonne Université, Inserm, Institut Pierre Louis d'Epidémiologie et de Santé Publique (iPLESP), AP-HP, Hôpital Saint-Antoine, Paris, France. <sup>7</sup>Sorbonne Université, AP-HP, Hôpital Trousseau, Service de Pneumologie Pédiatrique, Paris, France. <sup>8</sup>Division of Infectious Diseases, Department of Pediatrics, The Hospital for Sick Children, University of Toronto, Toronto, ON, Canada. <sup>9</sup>Translational Medicine Research Program, The Hospital for Sick Children, University of Toronto, Toronto, ON, Canada. <sup>10</sup>Department of Statistical Sciences, University of Toronto, Toronto, ON, Canada. <sup>11</sup>Department of Computer Science, University of Toronto, Toronto, ON, Canada. <sup>12</sup>The Centre for Applied Genomics, The Hospital for Sick Children, Toronto, ON, Canada.

Corresponding author: Lisa J. Strug ([lisa.strug@utoronto.ca](mailto:lisa.strug@utoronto.ca))

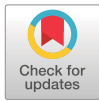

Shareable abstract (@ERSpublications)

This GWAS on 1037 Canadians with CF found two novel loci linked to chronic *Pseudomonas aeruginosa* (*Pa*) infection age, along with evidence of a shared polygenic component and a potential causal relationship between chronic *Pa* infection and lung disease <https://bit.ly/4fcMeFg>

**Cite this article as:** Lin B, Gong J, Keenan K, et al. Genome-wide association study of susceptibility to *Pseudomonas aeruginosa* infection in cystic fibrosis. *Eur Respir J* 2024; 64: 2400062 [DOI: 10.1183/13993003.00062-2024].

This extracted version can be shared freely online.

## Abstract

**Background** *Pseudomonas aeruginosa* is a common pathogen that contributes to progressive lung disease in cystic fibrosis (CF). Genetic factors other than CF-causing *CFTR* (CF transmembrane conductance regulator) variations contribute ~85% of the variation in chronic *P. aeruginosa* infection age in CF according to twin studies, but the susceptibility loci remain unknown. Our objective is to advance understanding of the genetic basis of host susceptibility to *P. aeruginosa* infection.

**Materials and methods** We conducted a genome-wide association study of chronic *P. aeruginosa* infection age in 1037 Canadians with CF. We subsequently assessed the genetic correlation between chronic *P. aeruginosa* infection age and lung function through polygenic risk score (PRS) analysis and inferred their causal relationship through bidirectional Mendelian randomisation analysis.

**Results** Two novel genome-wide significant loci with lead single nucleotide polymorphisms (SNPs) rs62369766 (chr5p12;  $p=1.98\times 10^{-8}$ ) and rs927553 (chr13q12.12;  $p=1.91\times 10^{-8}$ ) were associated with chronic *P. aeruginosa* infection age. The rs62369766 locus was validated using an independent French cohort ( $n=501$ ). Furthermore, the PRS constructed from CF lung function-associated SNPs was significantly associated with chronic *P. aeruginosa* infection age ( $p=0.002$ ). Finally, our analysis presented evidence for a causal effect of lung function on chronic *P. aeruginosa* infection age ( $\beta=0.782$  years,  $p=4.24\times 10^{-4}$ ). In the reverse direction, we observed a moderate effect ( $\beta=0.002$ ,  $p=0.012$ ).

**Conclusions** We identified two novel loci that are associated with chronic *P. aeruginosa* infection age in individuals with CF. Additionally, we provided evidence of common genetic contributors and a potential causal relationship between *P. aeruginosa* infection susceptibility and lung function in CF. Therapeutics targeting these genetic factors may delay the onset of chronic infections, which account for significant remaining morbidity in CF.

Copyright ©The authors 2024.

This version is distributed under the terms of the Creative Commons Attribution Non-Commercial Licence 4.0. For commercial reproduction rights and permissions contact [permissions@ersnet.org](mailto:permissions@ersnet.org)

This article has an editorial commentary:  
<https://doi.org/10.1183/13993003.01224-2024>

Received: 10 Oct 2022  
Accepted: 10 July 2024

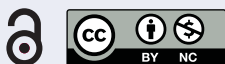

Supplement: ERJ-00062-2024.Shareable.pdf [file ERJ-00062-2024.Shareable.pdf]
